# Supplementary material
Source: publisher site journal article supplement (https://fr.pensoft.net/article/80134/download/suppl/31/)
Supplement: Supplementary file 1

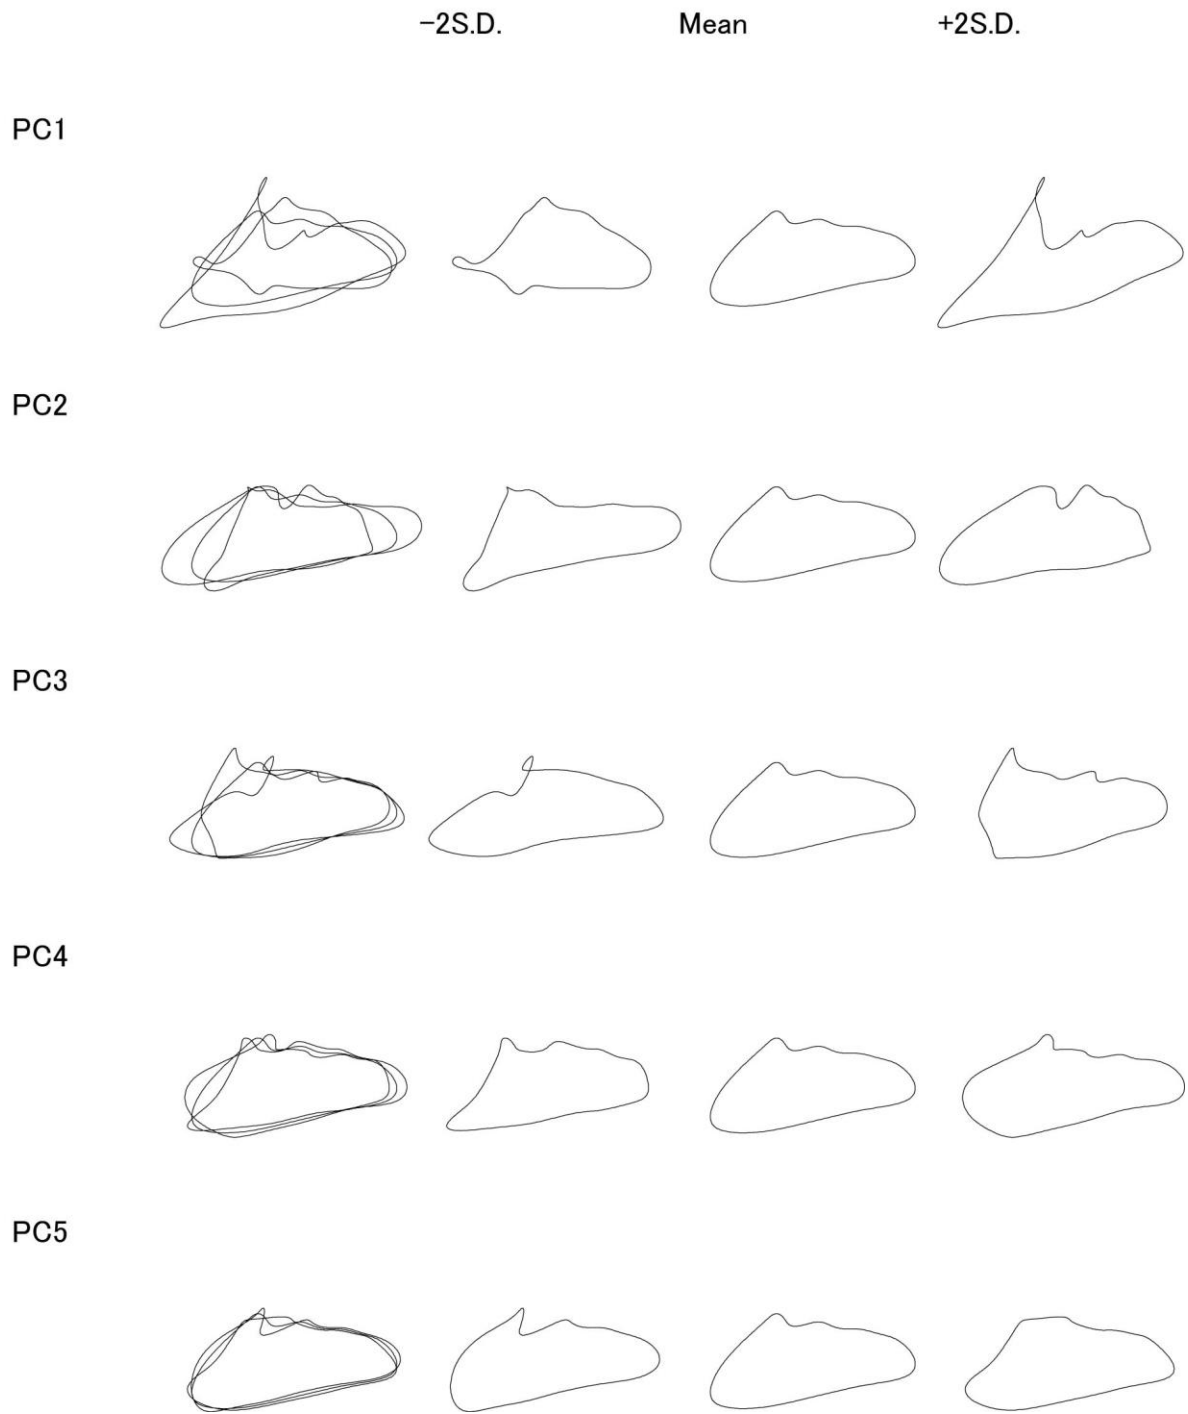

Supplementary figure 1. Shape-drivers of the principal components in the PCA analysis.

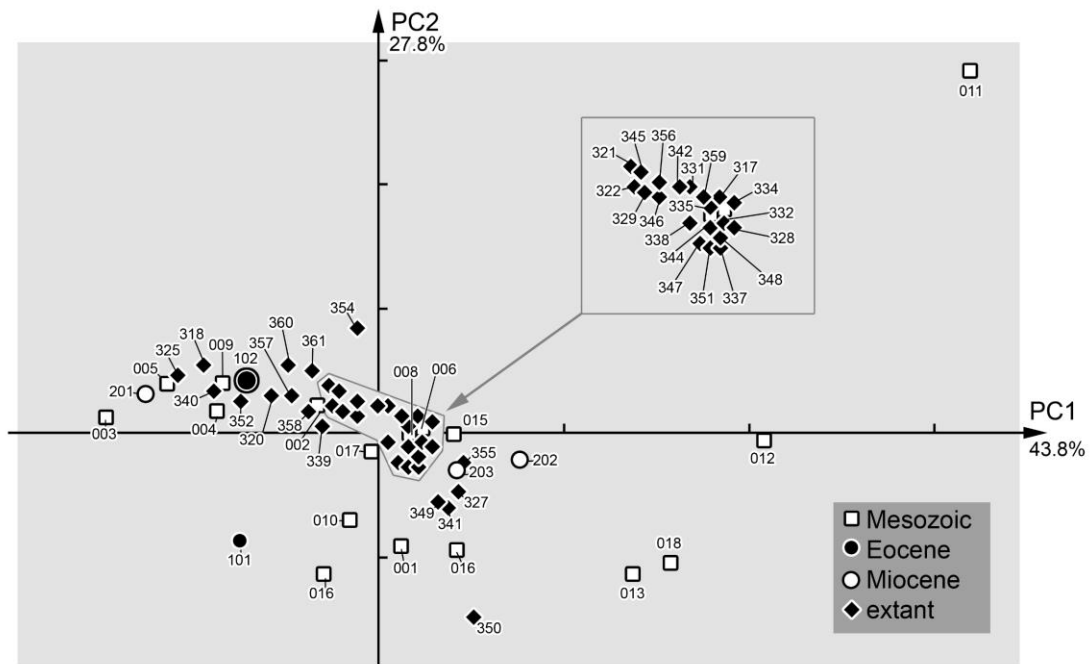

Supplementary figure 2. Numbered specimens used in the analysis. Legend to the numbers in the supplementary table 1 ([https://github.com/chironomus/Mantispidae-shape-analysis/blob/main/CLEANED FOR EOCENE Raptorial Neuropterans.xls](https://github.com/chironomus/Mantispidae-shape-analysis/blob/main/CLEANED_FOR_EOCENE_Raptorial_Neuropterans.xls))
